# Supplementary material
Source: Springer Nature journal article supplement (https://www.springermedizin.de/resource/supplementary/12943_2014_1285_MOESM2_ESM.pdf/9553146)
Supplement: MOESM2 [file 9553146]

Additional file 2

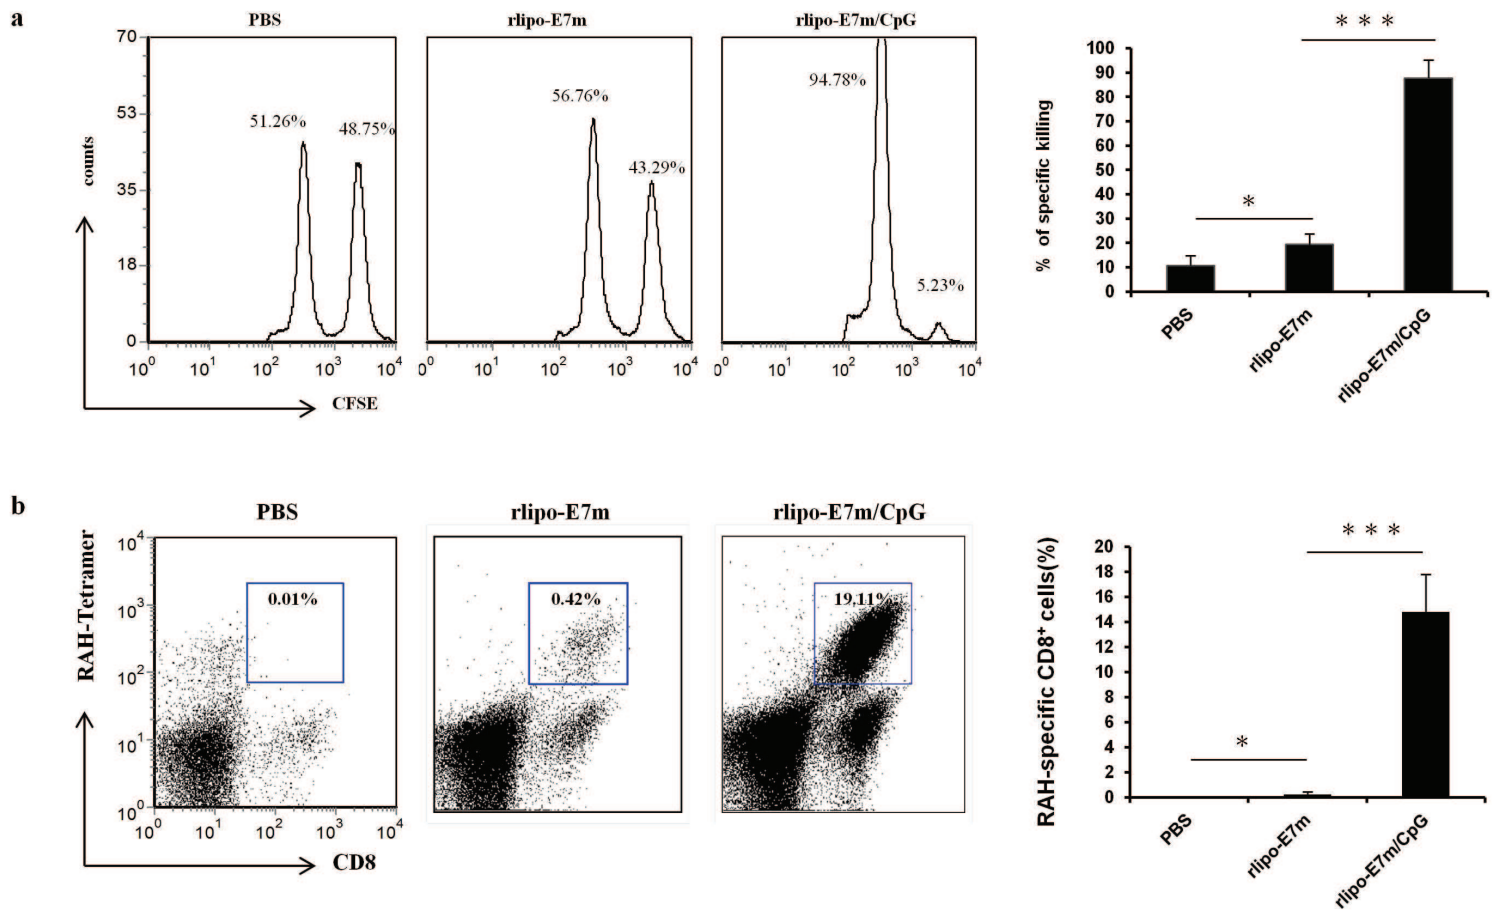

**Figure S2: Induction of CTL responses in tumor-bearing mice.** (a) CFSE-labeled cells were *i.v.* injected into tumor-bearing mice ( $n=6$  per group) 10 days after immunization. After 18 h, spleen cells were isolated from immunized mice and analyzed via flow cytometry. (b) The tumor cells were stained with an RAH/MHC I tetramer and anti-CD8 antibodies. The data represent the percentage of CD8<sup>+</sup>RAH Tet<sup>+</sup> in all cells. \*  $P < 0.05$ , \*\*  $P < 0.01$ , \*\*\*  $P < 0.001$ .
